# Supplementary material for: Abstract 14712: Exosomal Transfer of Hsf1 Prevents Apoptosis in Ischemic Myocytes by Chromatin Remodeling of Mir-34a
Source: Royal Society of Chemistry journal article supplement (doi:10.1039/c1lc20240e), 2013-11-26
Supplement: c1lc20240e.pdf [file c1lc20240e.pdf]

**Electronic supplementary information (ESI) for:**

**Effective Pressure and Bubble Generation in a Microfluidic T-junction**

**An-Bang Wang, I-Chun Lin, Yu-Wen Hsieh, Wen-Pin Shih and Guan-Wei Wu**

## Electronic Supplementary Information (ESI) S1

Relation between ( $P_e^*$ ) and ( $l \times f/v$ ) for droplet generation in flow focusing structure

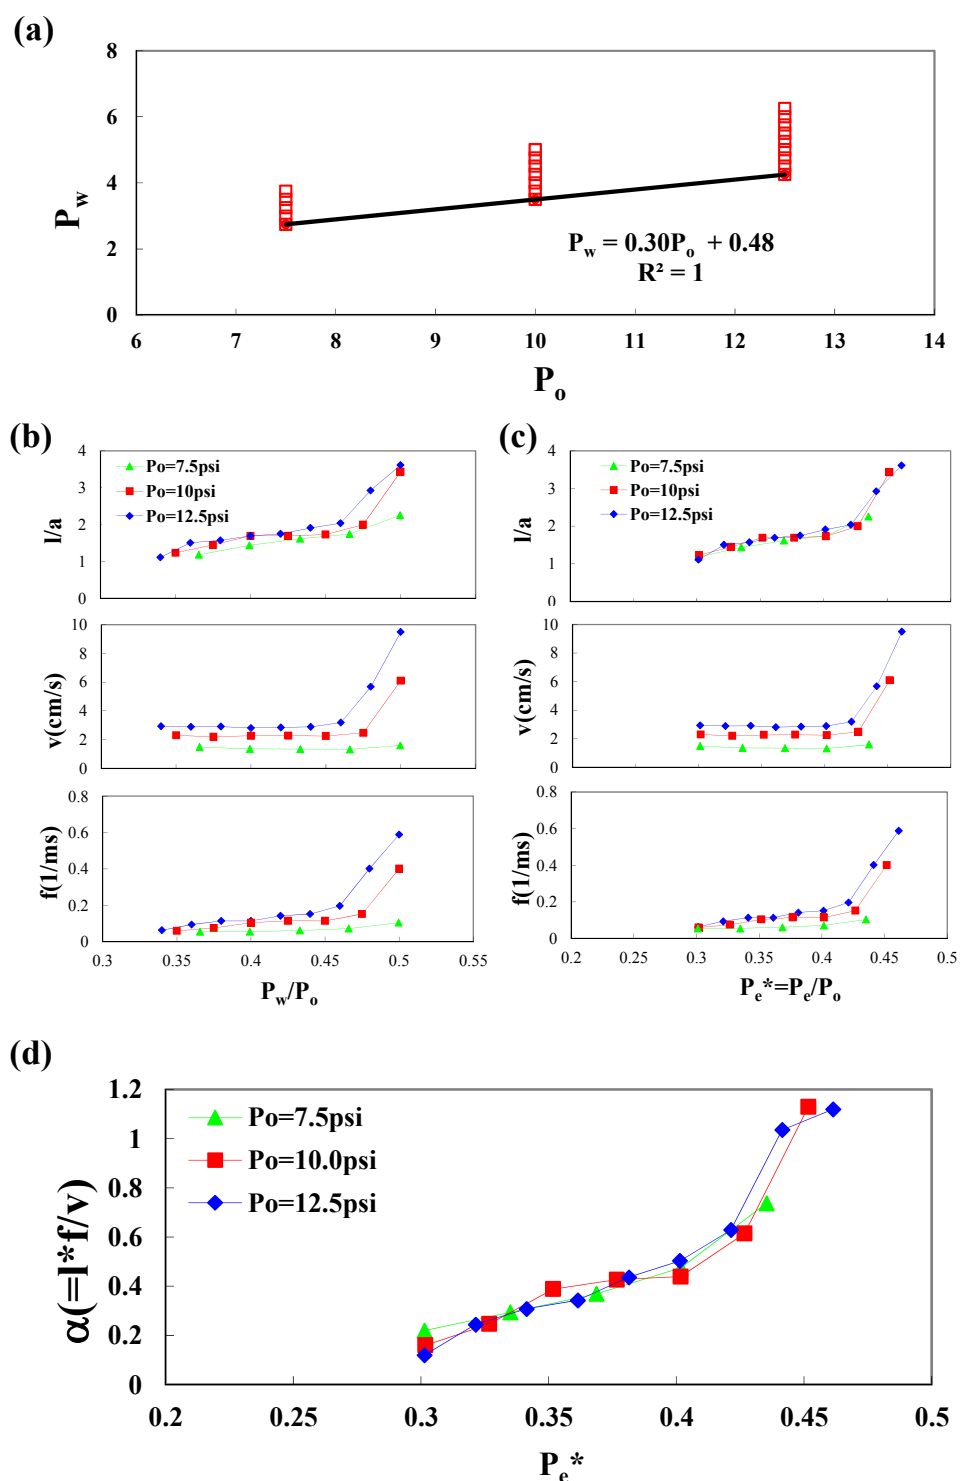

Fig. S1 The replotted results of flow focusing structure for water droplet generation by Ward et al.<sup>1</sup> (a) the flow map; two-phase flow characteristics ( $l/a$ ,  $v$  and  $f$ ) vs. (b)  $P_w/P_o$  and (c)  $P_e^*(= P_e/P_o)$ ; (d) void fraction( $\alpha$ ) vs.  $P_e^*$ .

We followed the same process as mentioned in text to replot the relationship between  $P_e^*$  and  $l_d \times f / v_d$  for the case of droplet generation by flow focusing structure in Ward et al.<sup>1</sup> Fig. S1(a) shows the lower border of operation range of droplets has linear relationship of  $P_w = 0.30 \times P_o + 0.48$ , where the interception is physically contributed by the surface pressure,  $P_\sigma$ . In this case, to eliminate the contribution of surface tension force, the effective pressure can similarly be written as  $P_e = P_w - P_\sigma = P_w - 0.48$ . Therefore, the data ( $l_d/a$ ,  $v$  and  $f$ ) of Ward et al.<sup>1</sup> with respect to  $P_w/P_o$ , as shown in Fig. S1(b), can be replotted as the function of  $P_e^*$  ( $=P_e/P_o$ ) as shown in Fig. S1(c). Unlike that in Fig. S1(b), the lower border of data in Fig. S1(c) have shifted to almost the same  $P_e^*$ -value. Furthermore, the dimensionless two-phase flow characteristics,  $l_d \times f / v_d$ , with the physical meaning of droplet void fraction ( $\alpha_d$ ), can be plotted with respect to the effective pressure ratio,  $P_e^*$ , as shown in Fig. S1(d). The  $\alpha_d$ -curves for different  $P_o$ -values coincide together. This is the same as the present results by T-junction shown in Fig. 3(d) in the text. Three data points have values of  $\alpha_d > 1$ , that contravene the definition of void fraction. This overestimation may come partly from the measuring errors and partly from the one-dimensional simplified droplet volume estimation for the void fraction.

1. T. Ward, M. Faivre, M. Abkarian and H. A. Stone, *Electrophoresis*, 2005, **26**, 3716-3724.

## Electronic Supplementary Information (ESI) S2

Relationship between  $\beta_d$  and  $(P_e^* - G^*)$  for whole range of  $G^*$

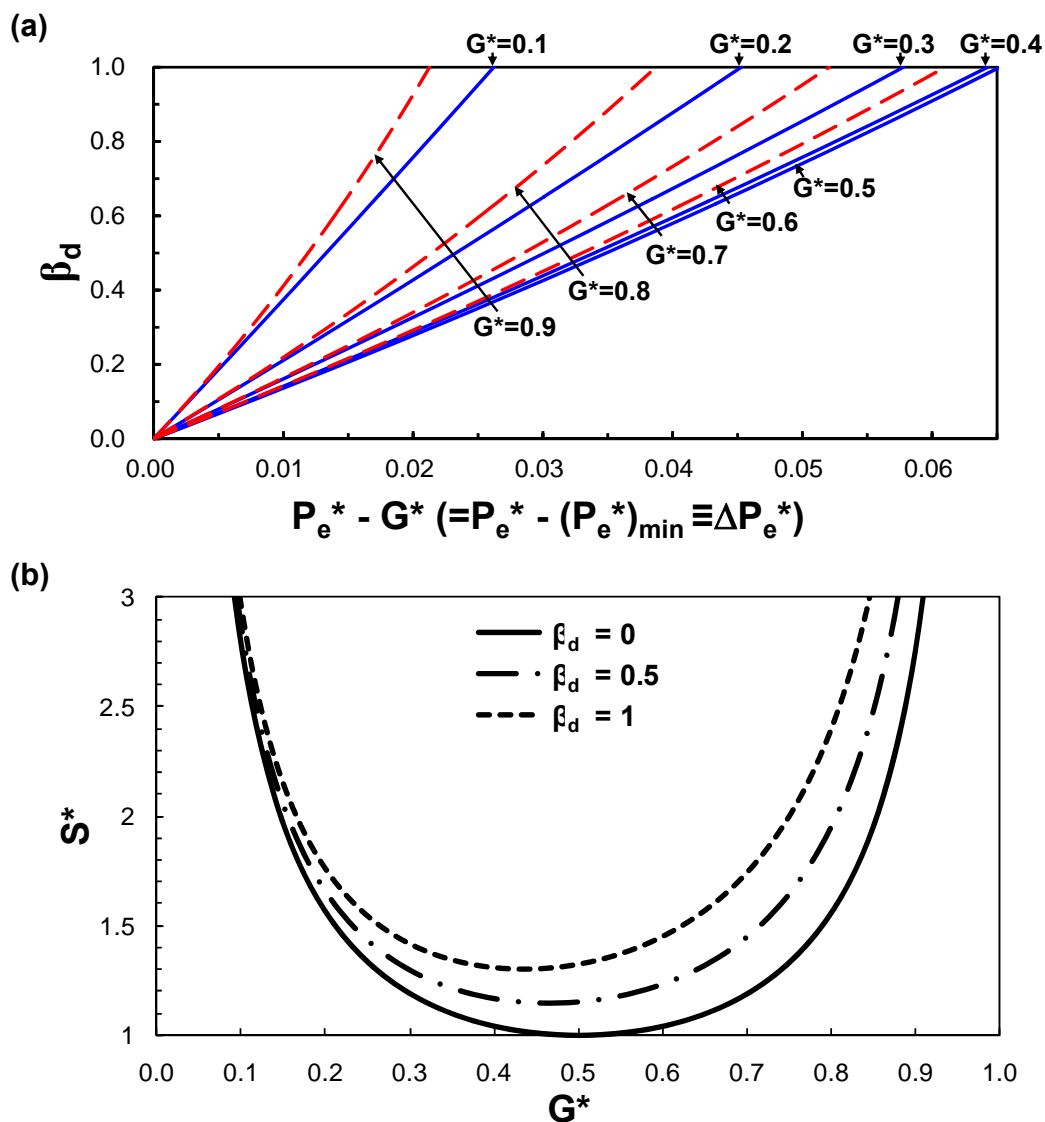

**Fig. S2** (a) Predicted  $\beta_d - (P_e^* - G^*)$  curves of different  $G^*$  and (b)  $G^*$  effects on dimensionless slope ( $S^*$ ) of  $\beta_d - (P_e^* - G^*)$  curves.

To further investigate the effect of geometrical design on the gas flow ratio, the  $\beta_d - (P_e^* - G^*)$  curves determined by Eq. (13) in text for different  $G^*$ -values are plotted for the whole range of  $G^*$  from 0.1 to 0.9 in Fig. S2(a). The (blue) solid lines represent for those curves of  $G^* \leq 0.5$  and the (red) dashed lines for  $G^* > 0.5$ . It shows that the slope of  $\beta_d - (P_e^* - G^*)$  curve decreases for increasing  $G^*$ -value until  $G^* = 0.5$ , and then the slope increases as  $G^*$  is increasing further from

0.5 to 0.9. This indicates physically that a T-junction, having roughly equal upstream and downstream lengths could have the largest operation range of bubbly/slug flow for a given  $\beta_d$ -value. The slopes of  $\beta_d - (P_e^* - G^*)$  curves become steeper as  $G^*$ -value differs from 0.5. Moreover, the nonlinearity of predicted curve in Fig. S3 (a) becomes more significant as the  $G^*$ -value increases. To get deeper insight into the variations of  $\beta_d - (P_e^* - G^*)$  curves, the slope  $S$  can be determined from the first derivative of Eq. (13) in text as

$$S = \frac{d\beta_d}{d(P_e^* - G^*)} = \frac{1 - G^*}{nG^*(1 - P_e^*)^2}. \quad (\text{S2-1})$$

The dimensionless slope  $S^*$ , defined as  $S$  normalized by the slope at  $G^* = 0.5$  as  $\beta_d = 0$ , were plotted in Fig. S3 (b) in terms of  $G^*$  for  $\beta_d = 0, 0.5$  and  $1$ , respectively. It reveals that the curve of  $\beta_d = 0$ , the lower border of bubbly/slug regime, denoted as  $S_0^*$ -curve and shown as the solid line, is symmetric to the axis of  $G^* = 0.5$ . However, the  $S^*$  curve of  $\beta_d = 1$ , denoted as  $S_1^*$ -curve and shown as the dashed line, is asymmetric and has in general larger slope than that of  $S_0^*$  except  $G^*$  -value approaching zero. Physically, the gap difference between  $S_0^*$  and  $S_1^*$  for any given  $G^*$ -value can be interpreted as the indicator of the nonlinearity of  $\beta_d - (P_e^* - G^*)$  curve. This means that the larger the gap is, the more nonlinear the  $\beta_d - (P_e^* - G^*)$  curve becomes. It does show a fact that the design with small  $G^*$  for the same gas flow ratio can have the advantage of a quasi-linear relationship of operation parameter  $(P_e^* - G^*)$ , but combines also higher challenges in the manufacture process. This nonlinear phenomenon comes from the weighting competition between the upstream single-phase liquid part with constant viscosity and the downstream two-phase fluid part with nonlinear viscosity relation of  $\beta_d$ . As  $G^*$  or  $\beta_d$  is small, the linear upstream part dominates or the nonlinear downstream part is negligible and therefore it shows a linear-like character. In opposite, as  $G^*$  is large, the downstream weighting becomes important and the nonlinear effect thus dominates. Similarly, the nonlinearity becomes also significant for the case of large  $\beta_d$ .
